# Supplementary material for: A TAD boundary is preserved upon deletion of the CTCF-rich Firre locus
Source: PubMed Central journal article supplement (PMC5899154; doi:10.1038/s41467-018-03614-0), 2018-04-13
Supplement: 41467_2018_3614_MOESM1_ESM.pdf [file 41467_2018_3614_MOESM1_ESM.pdf]

Supplementary Information:

**A TAD boundary is preserved upon deletion of the CTCF-rich *Firre* locus**

**Barutcu *et al.***

Contents:

Supplementary Figures 1-11

Supplementary Tables 1-4

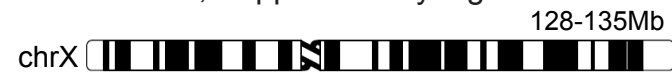

*FIRRE*

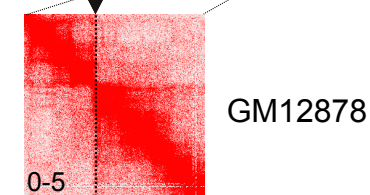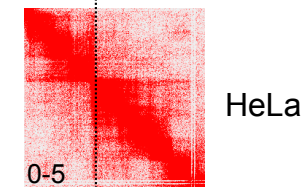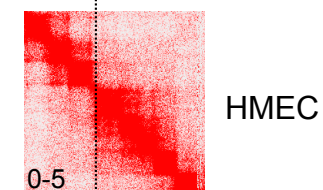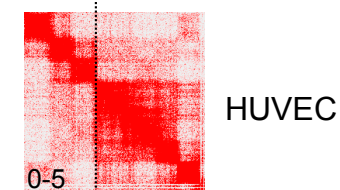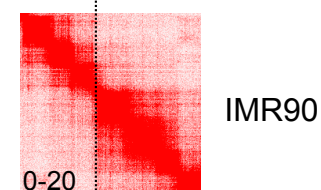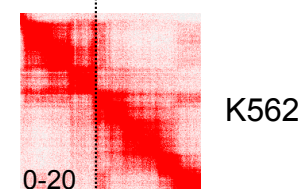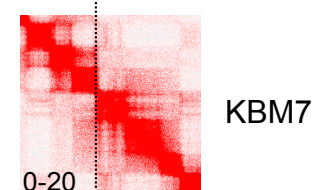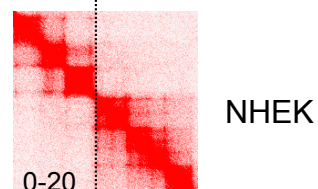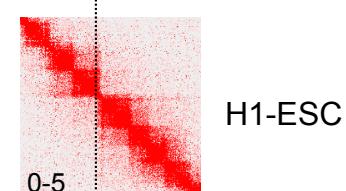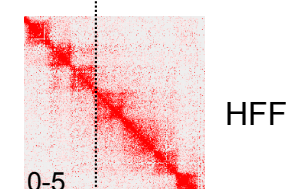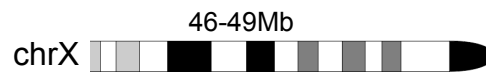

*Firre*

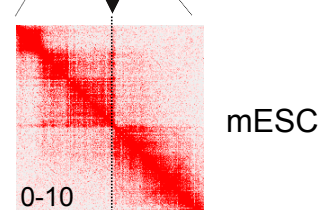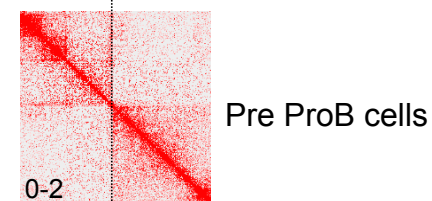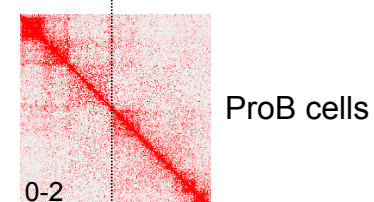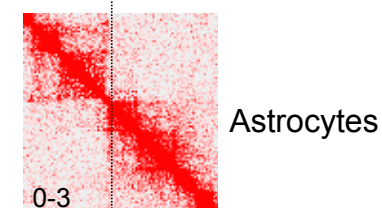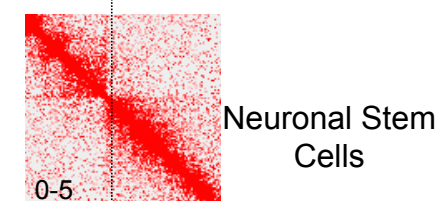

**Supplementary Figure 1 – *FIRRE* / *Firre* lncRNA gene is consistently located at a TAD boundary in multiple human and mouse cell types.** Hi-C interaction heatmaps, extracted with the Juicebox software, of the *FIRRE* / *Firre* locus in multiple human cell types. The dashed line designates the *FIRRE* / *Firre* locus, which consistently lies at a TAD boundary.

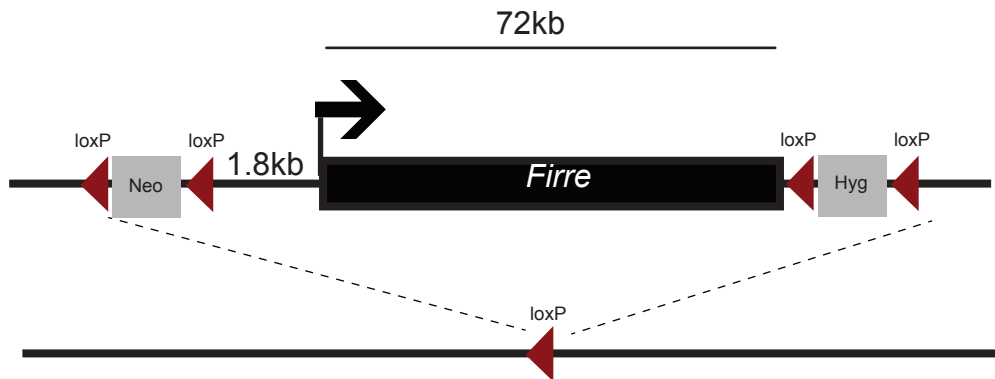

**Supplementary Figure 2 – Deletion strategy of the *Firre* IncRNA.** Upon *Firre* deletion, the entire *Firre* gene, the promoter region and 1.8kb of the 3' end flanking sequences are removed (see Methods) (mm9, chrX:47908463-47990293).

**a**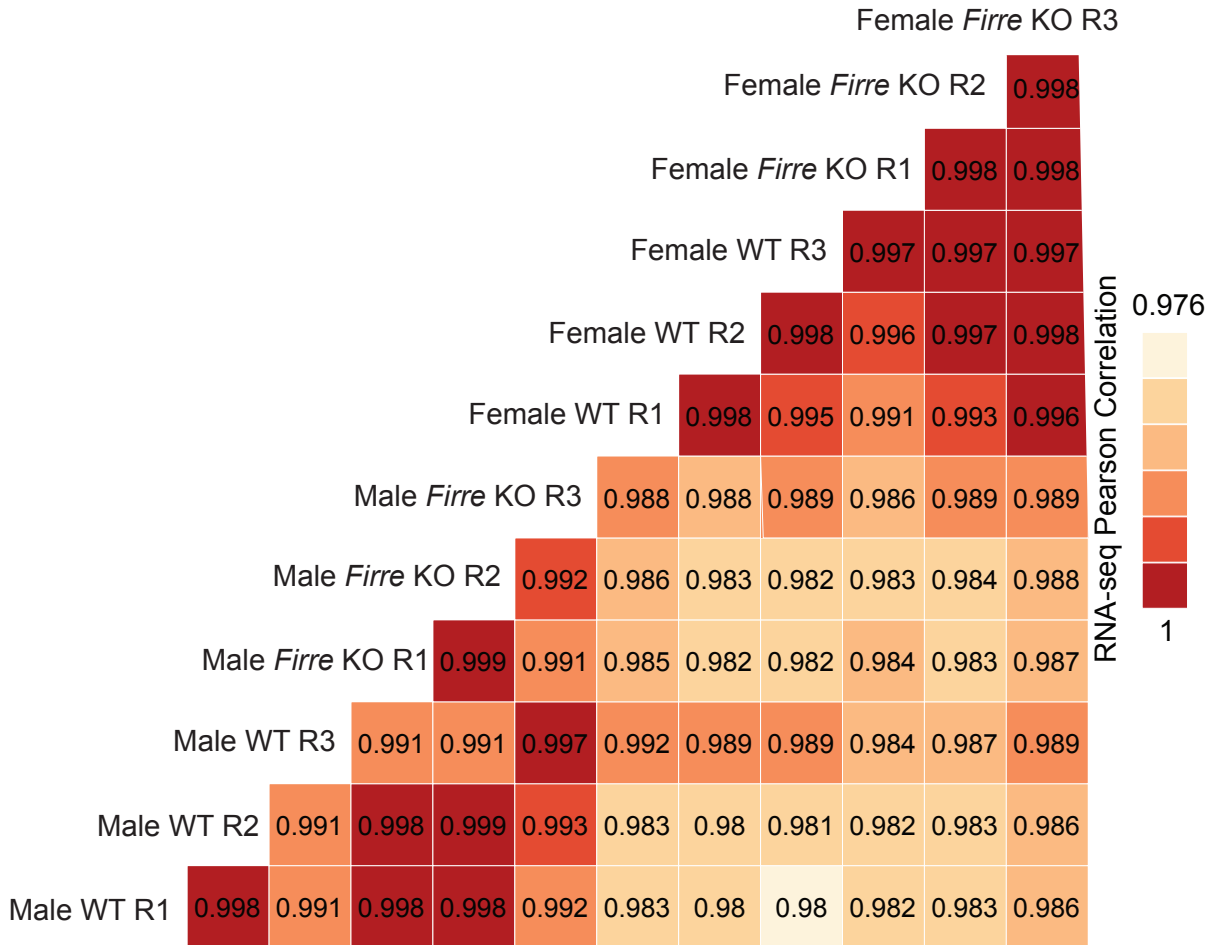**b**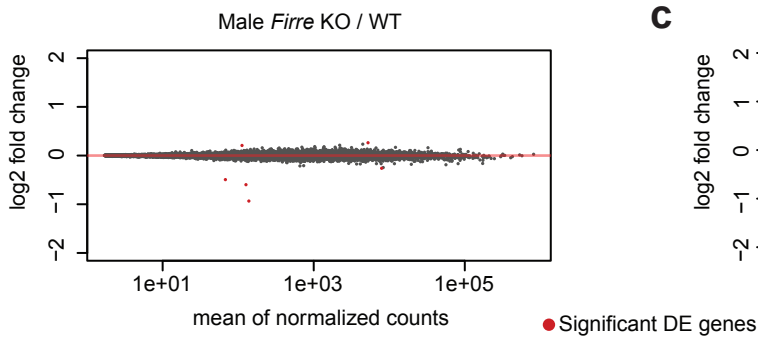**c**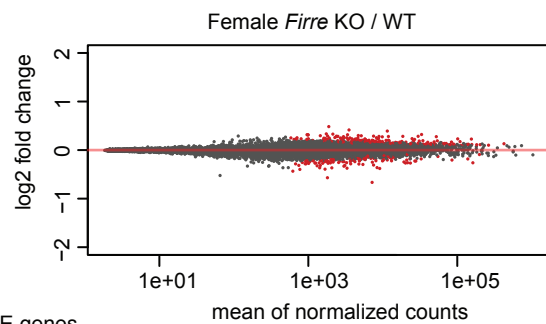

**Supplementary Figure 3 – RNA-seq analysis of *Firre* KO and wildtype male and female MEFs.** **a)** Pearson correlation matrix showing the reproducibility between each RNAseq replicate. **b-c)** Plots showing the expression levels of the genes as a function of *Firre* KO vs. WT log<sub>2</sub> fold change in **b)** male cells, and **c)** in female cells. *Firre* shows a higher number of significantly down-regulated genes in female samples compared to males.



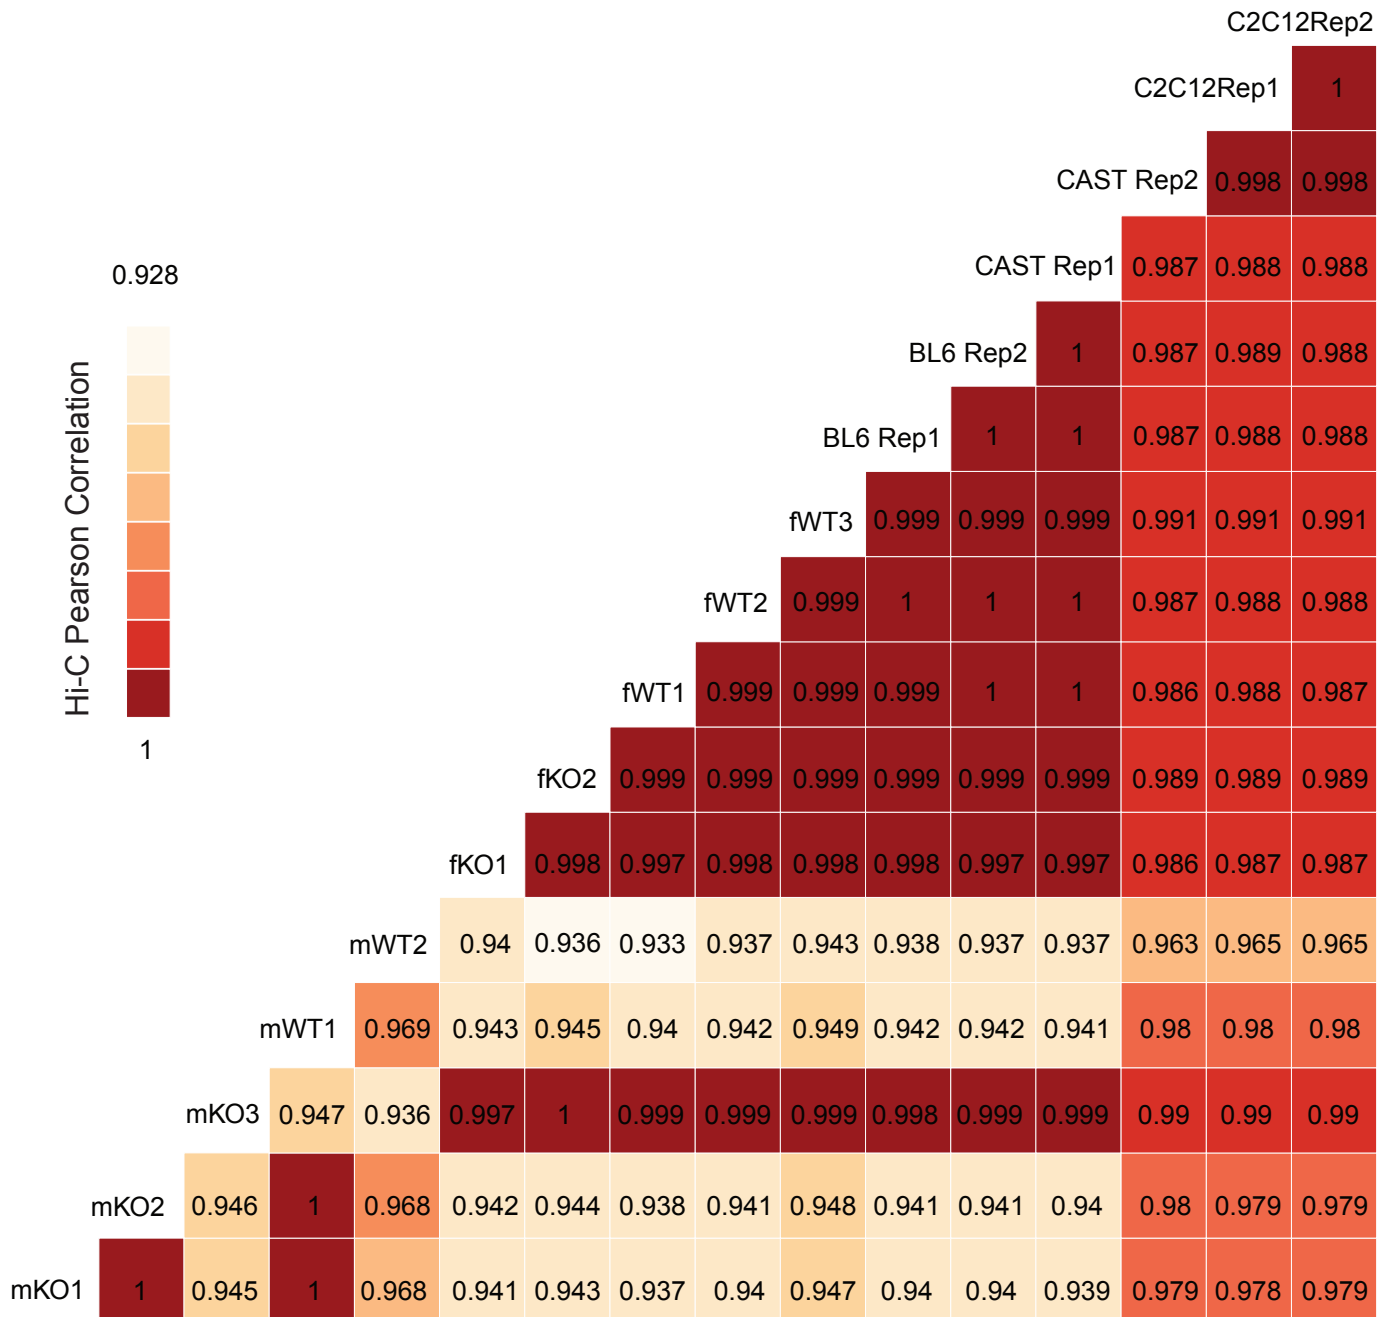

**Supplementary Figure 4 – Hi-C Correlations.** Pearson correlation matrix showing the reproducibility between each Hi-C replicate for male, female and allele specific MEFs (C57BL6 x CAST), as well as C2C12 cells.

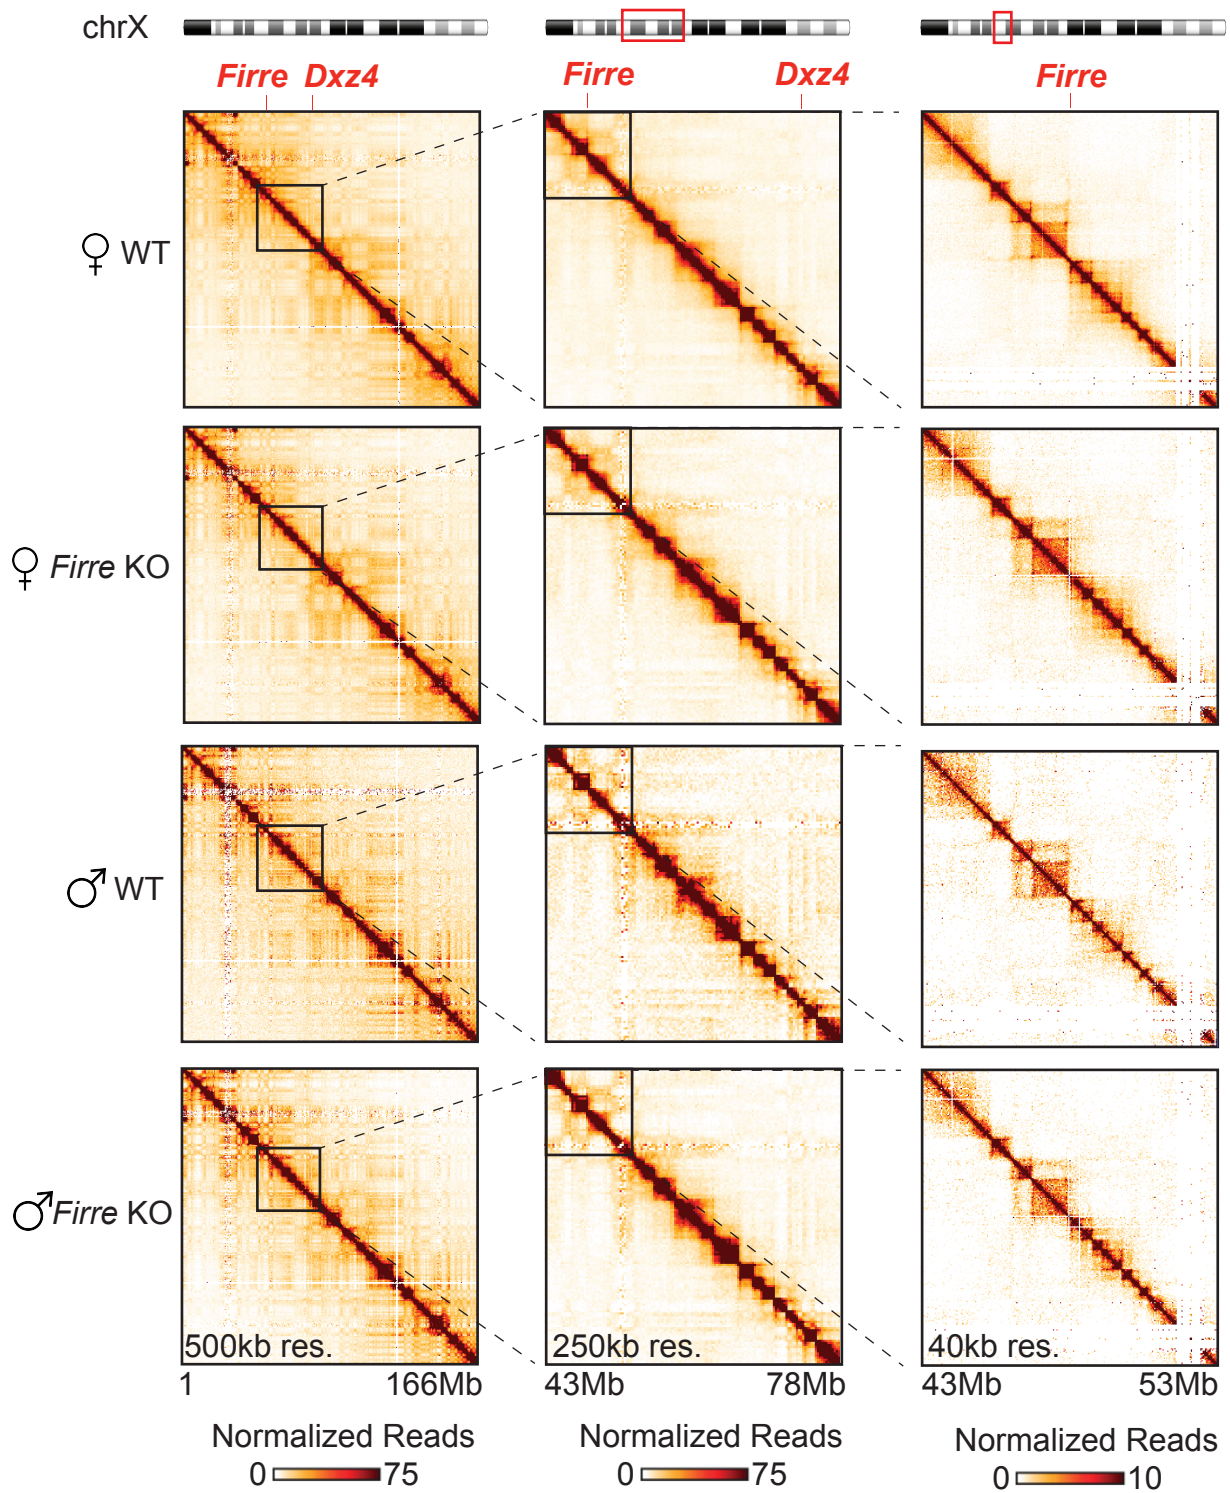

**Supplementary Figure 5 - Interaction heatmaps of the MEF Hi-C data.** Heatmaps for female and male wildtype and *Firre* KO combined MEF Hi-C samples for chromosome X at 500kb resolution (left), with a zoom in between 43-78Mb at 250kb resolution (middle), and between 43-53Mb (*Firre* locus) at 40kb resolution.

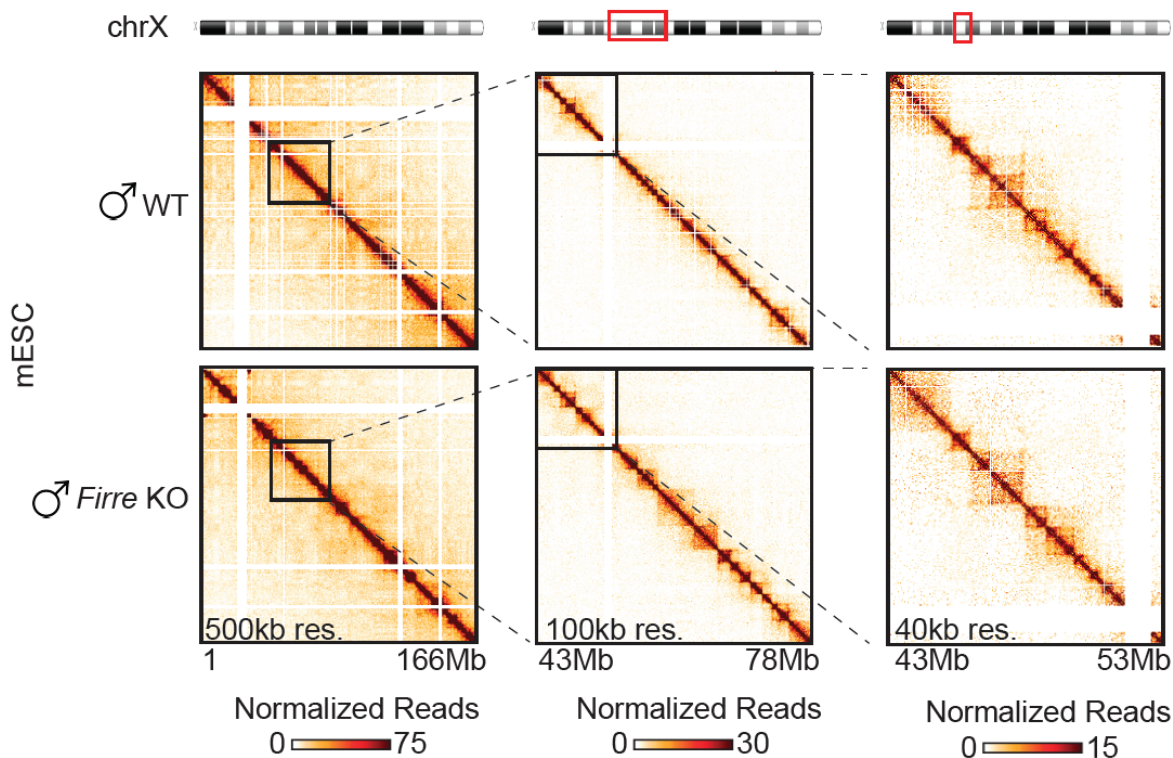

**Supplementary Figure 6 - Hi-C data of wildtype and *Firre* KO mESCs.** Heatmaps for female and male wildtype and *Firre* KO combined mESC Hi-C samples for chromosome X at 500kb resolution (left), with a zoom in between 43-78Mb at 100kb resolution (middle), and between 43-53Mb (*Firre* locus) at 40kb resolution.

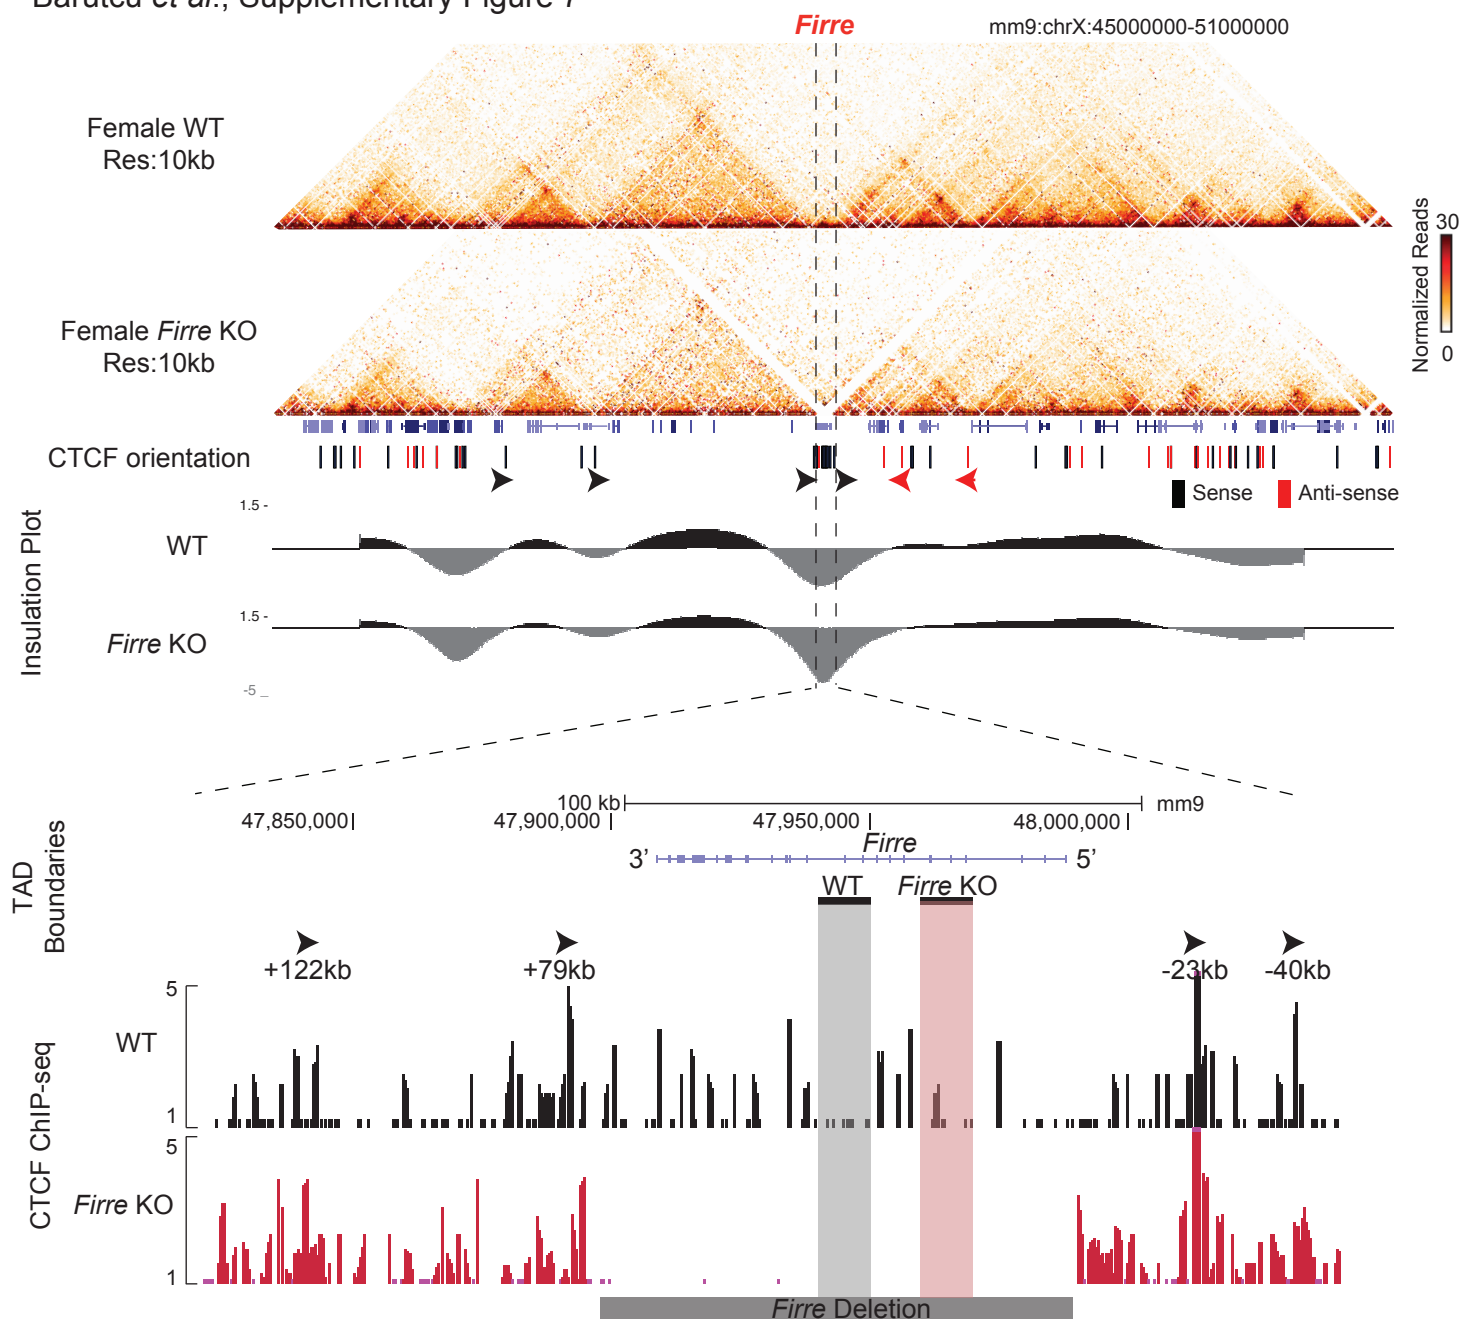

**Supplementary Figure 7 – Surrounding CTCF binding sites are not located on the *Firre* TAD boundary.** 10kb resolution Hi-C heatmaps of female WT and *Firre* KO samples, the UCSC gene track and the CTCF orientation is shown, highlighting the orientation of the CTCF sites surrounding *Firre* and the neighboring boundaries. Below, a zoom-in view showing the TAD boundaries and the CTCF ChIP-seq signal track from wildtype and *Firre* KO MEFs showing the four surrounding CTCF sites located at +122kb, +79kb, -23kb and -40kb of the *Firre* transcriptional start site (TSS), outside of the *Firre* TAD boundary (highlighted).



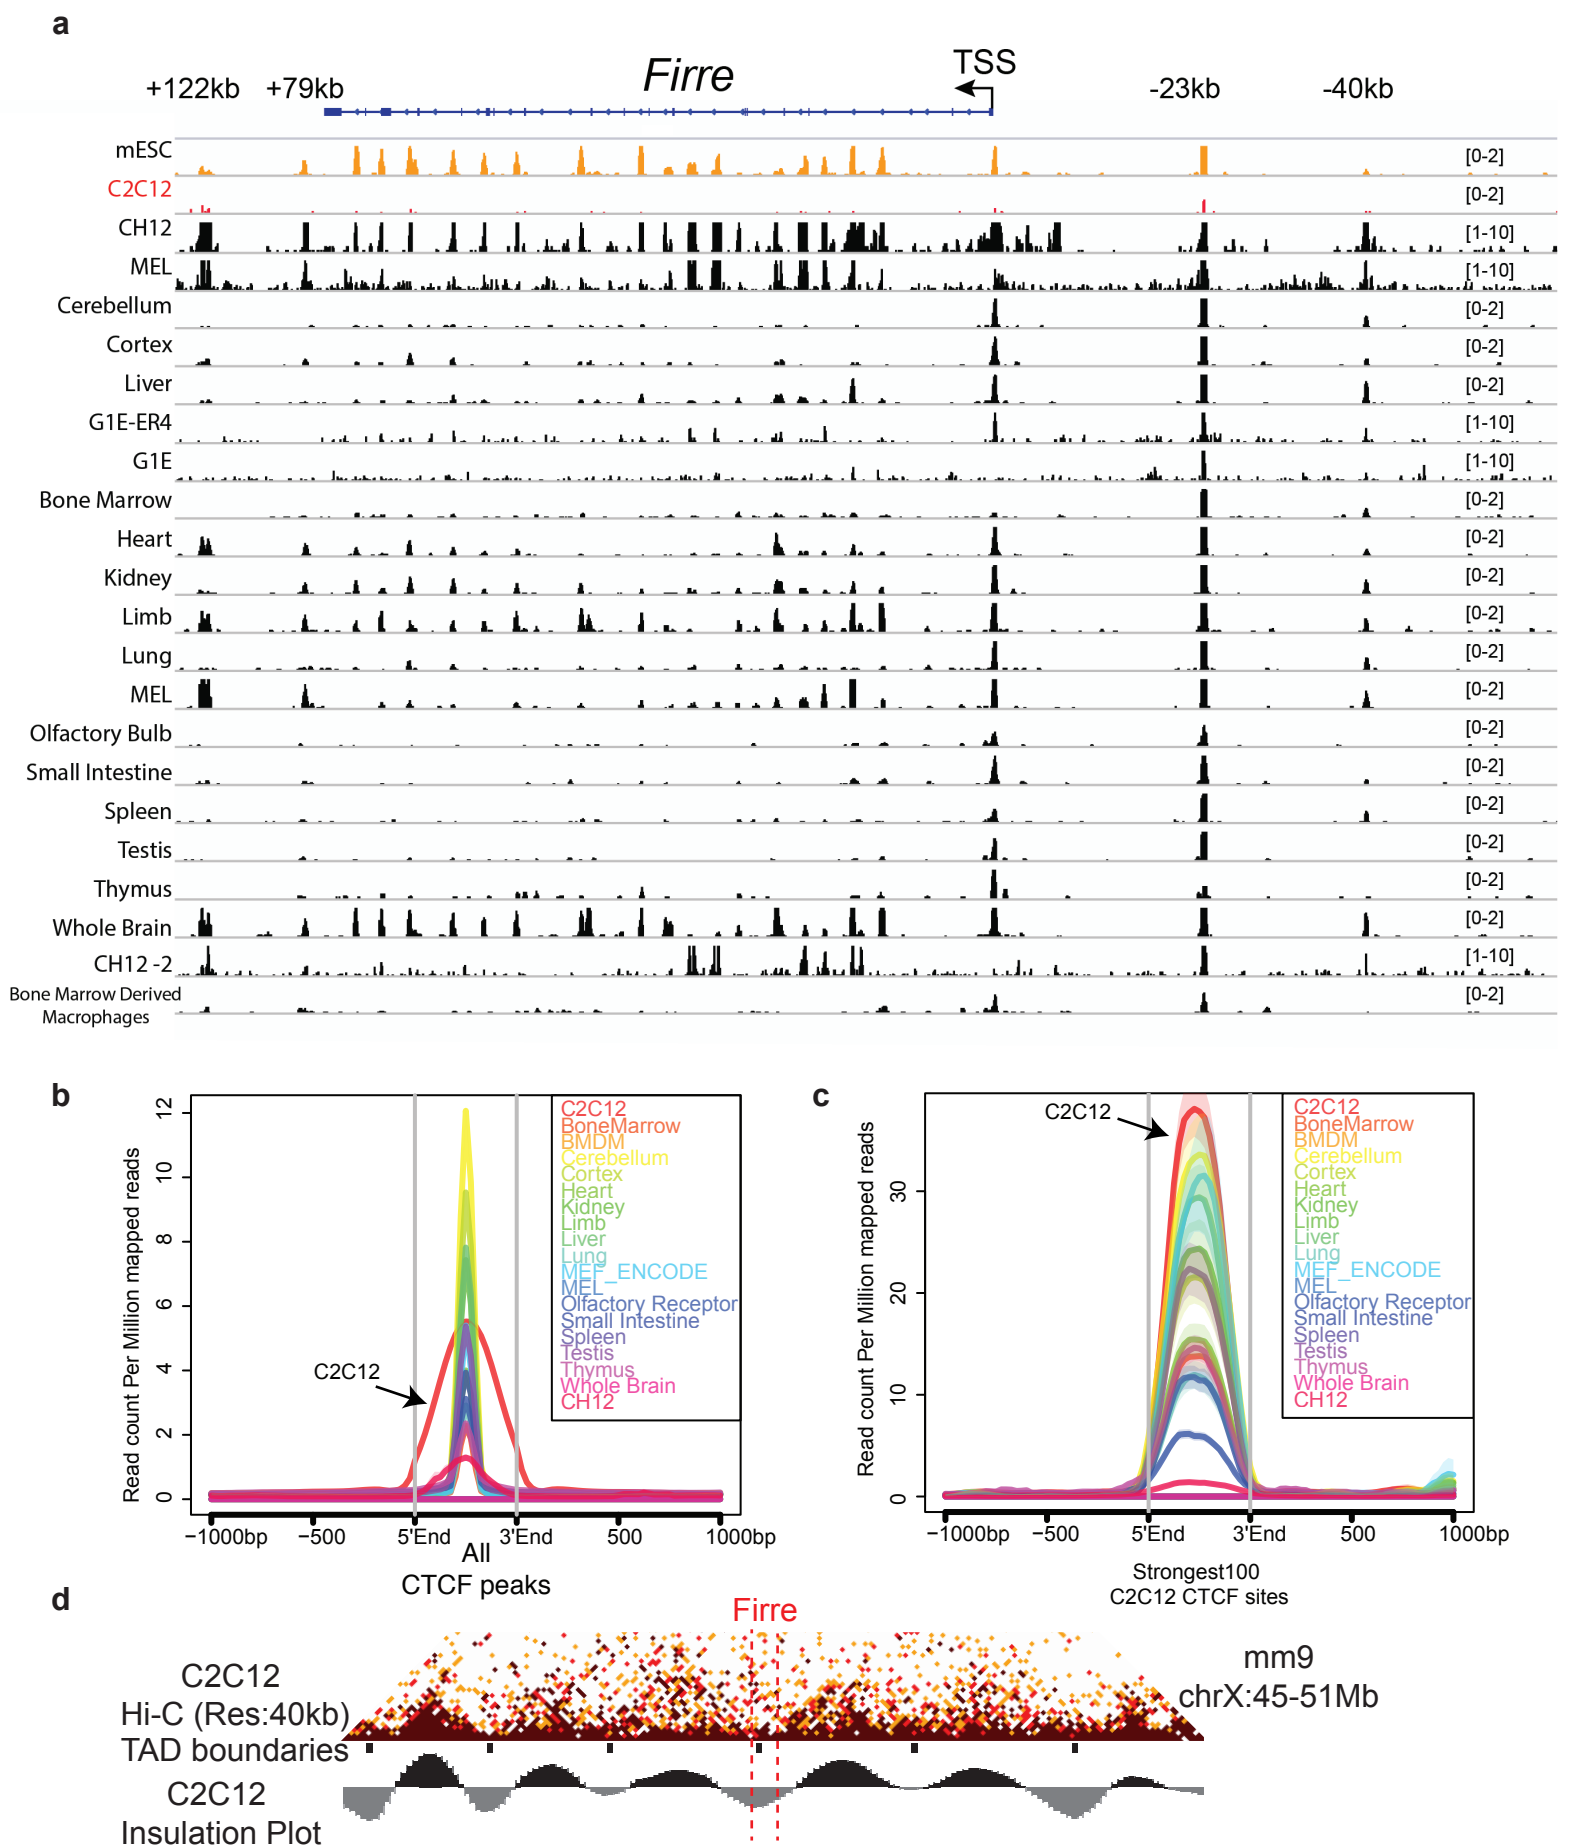

**Supplementary Figure 8 – C2C12 cells shows reduced CTCF binding at surrounding sites.** The preservation of the *Firre* TAD boundary is not compensated by the surrounding CTCF sites. **a)** IGV browser track showing the CTCF binding neighboring the *Firre* locus in multiple mouse cell types. 3 of the 4 neighboring CTCF peaks showed variable binding across the cell types, indicating that these sites cannot account for the TAD boundary formation since the boundary can form in their absence. C2C12 cells show reduced CTCF binding throughout the region with minimal signal at the -23kb position. **b)** ChIP-seq signal intensity for C2C12 and the ENCODE CTCF datasets centered on all CTCF peaks for each cell type. **c)** Average signal profile for the ENCODE CTCF data centered strongest 100 C2C12 peaks, indicating that the reduced signal at -23kb is not due to a bias in the C2C12 dataset. **d)** C2C12 Hi-C interaction heatmap at 40kb resolution showing +/- 5 Mb of the *Firre* gene locus (mm9 chrX:45-51Mb), with the TAD boundary and insulation track below. Less intense binding of the +122kb, +79kb and -40kb CTCF sites cannot fully explain the establishment or maintenance of the *Firre* TAD boundary.

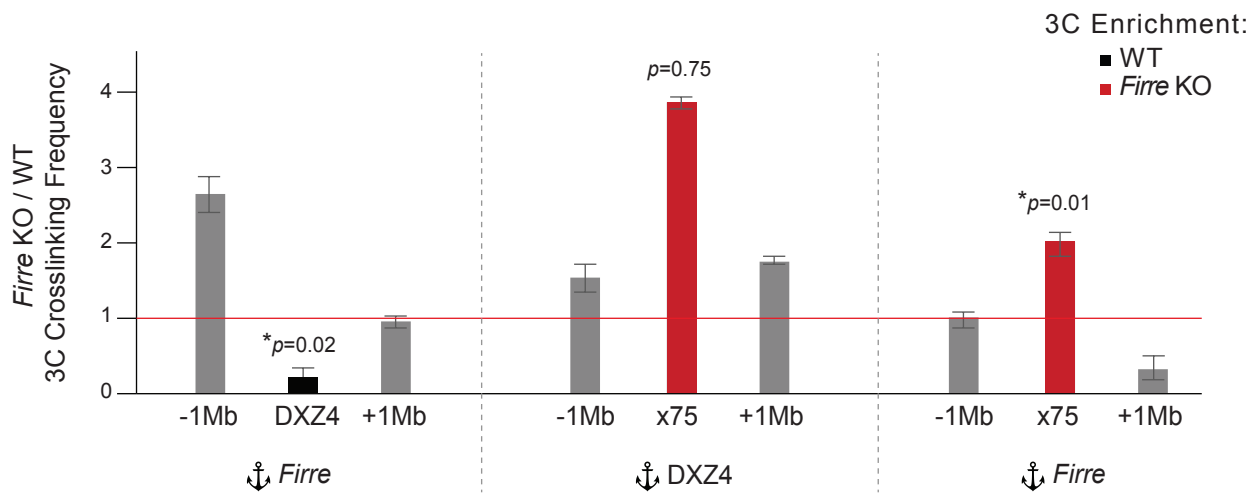

**Supplementary Figure 9 – Chromosome conformation capture (3C) analysis of superloop interactions validate Hi-C and live-cell imaging results.** Female *Firre* KO versus wildtype 3C interaction frequency ratios between *Firre*, DXZ4 and x75, along with 1Mb surrounding regions. Interaction frequencies less than 1 indicates 3C enrichment in the wildtype sample. The anchor primers are indicated below each section.

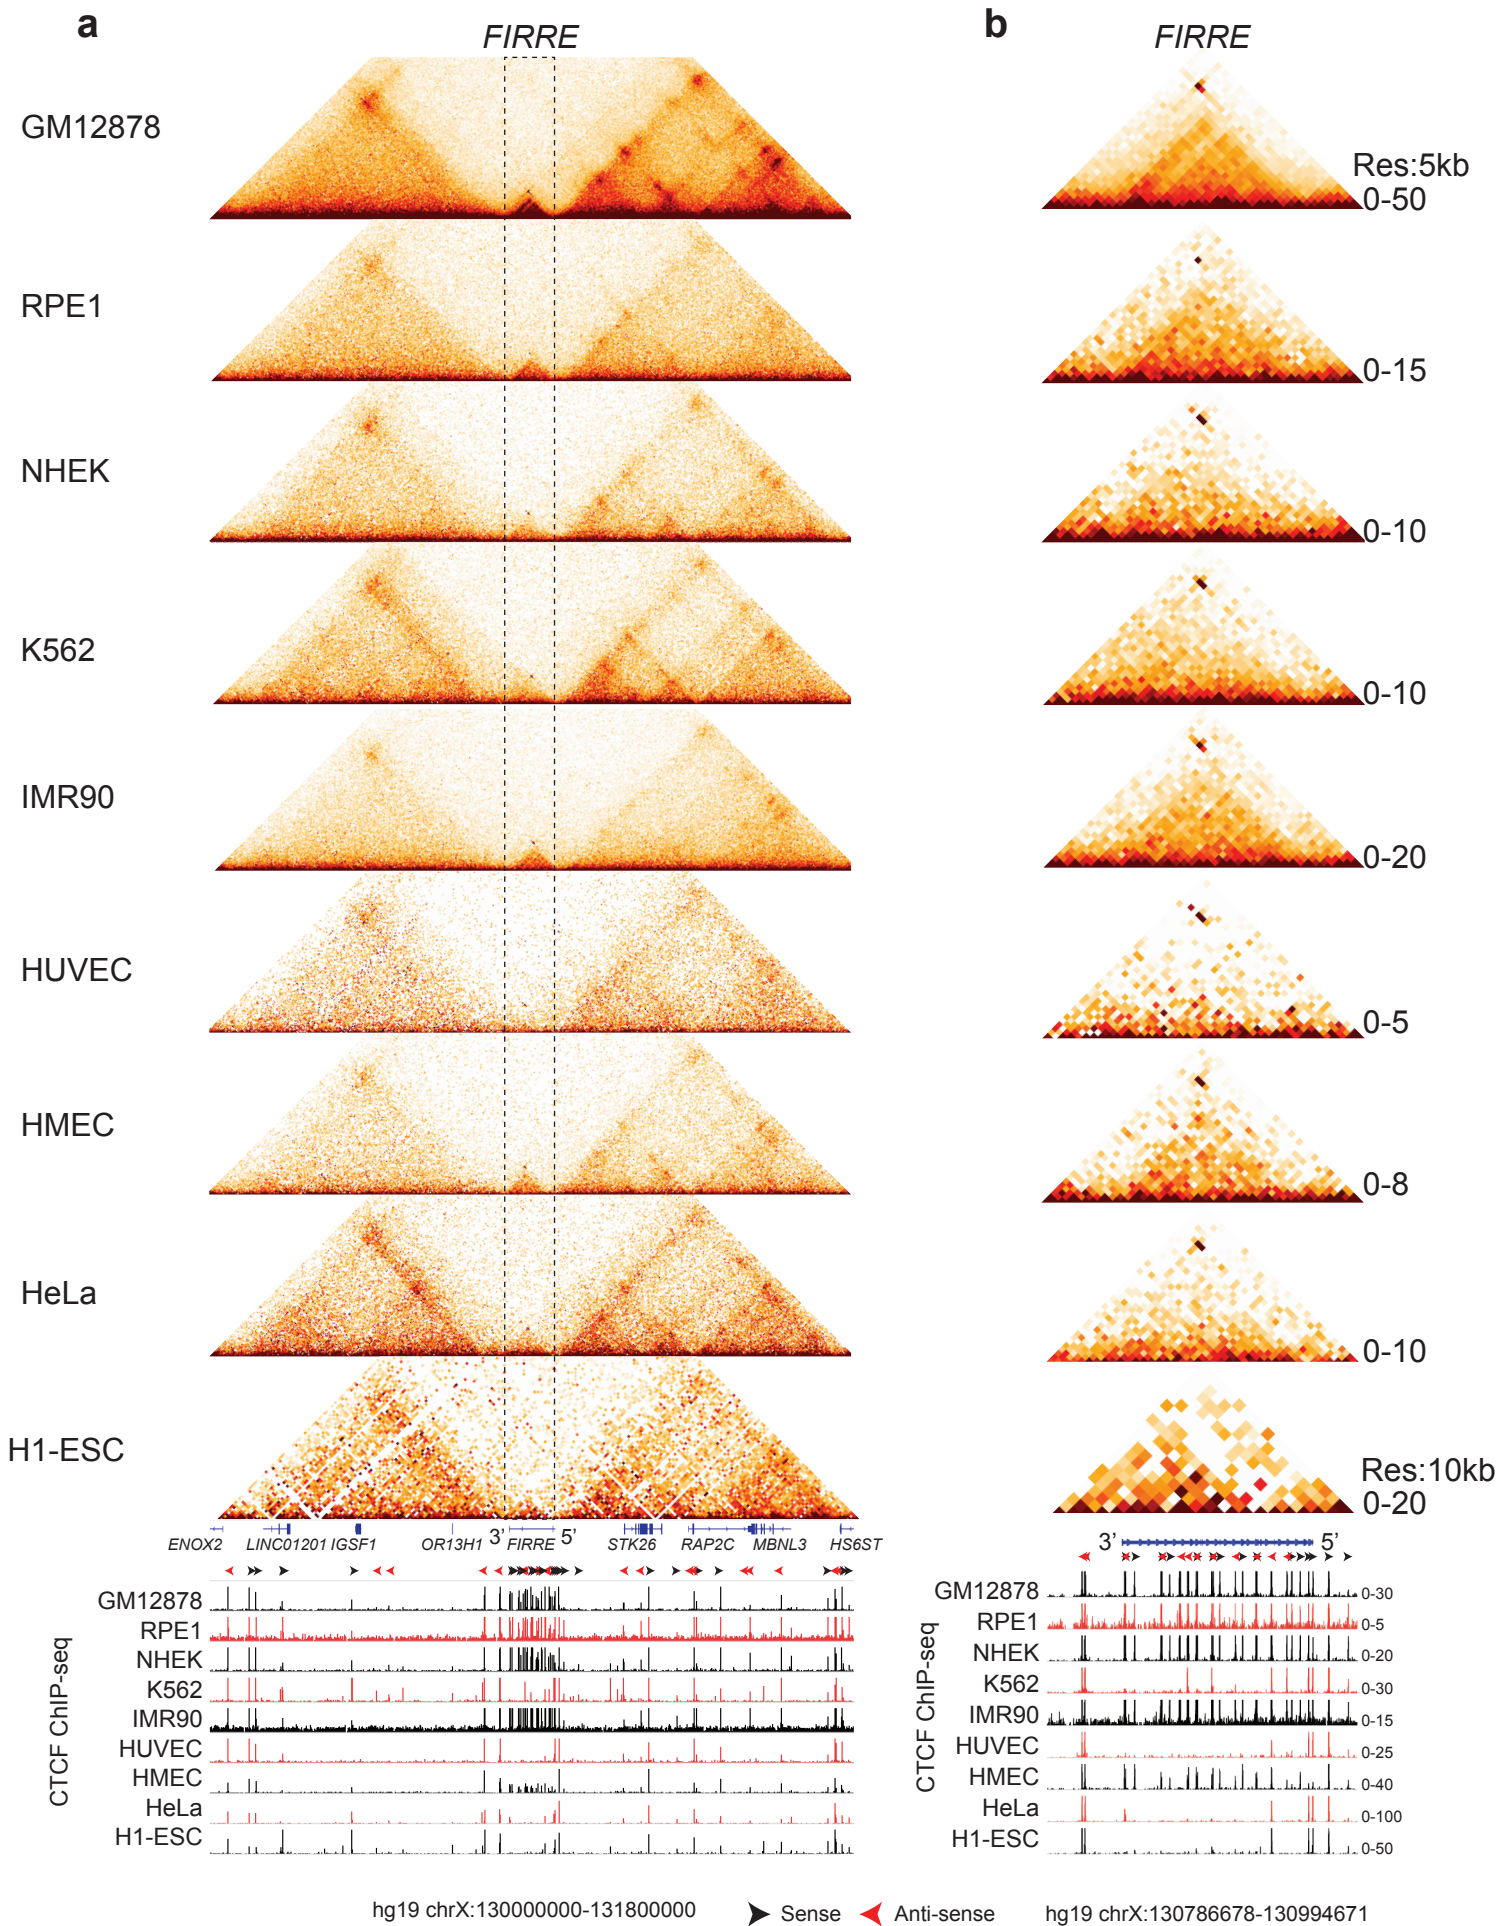

**Supplementary Figure 10 – High resolution interaction topology of the *FIRRE* locus in human samples.** **a)** Hi-C interaction heatmaps showing the neighboring TADs of the *FIRRE* locus in multiple cell types. The CTCF binding and orientation is included below. In all cell types, *FIRRE* seems to be making a circular looping structure, a feature not so prevalent in mouse (Supplementary Figure 11). **b)** A zoom-in of the interaction profile of *FIRRE* gene with CTCF binding and orientations. The presence of a circular formation can be observed by a dark interacting bin between the 3' and 5' end of *FIRRE*. The H1-ES cells does not appear to be forming such a structure.



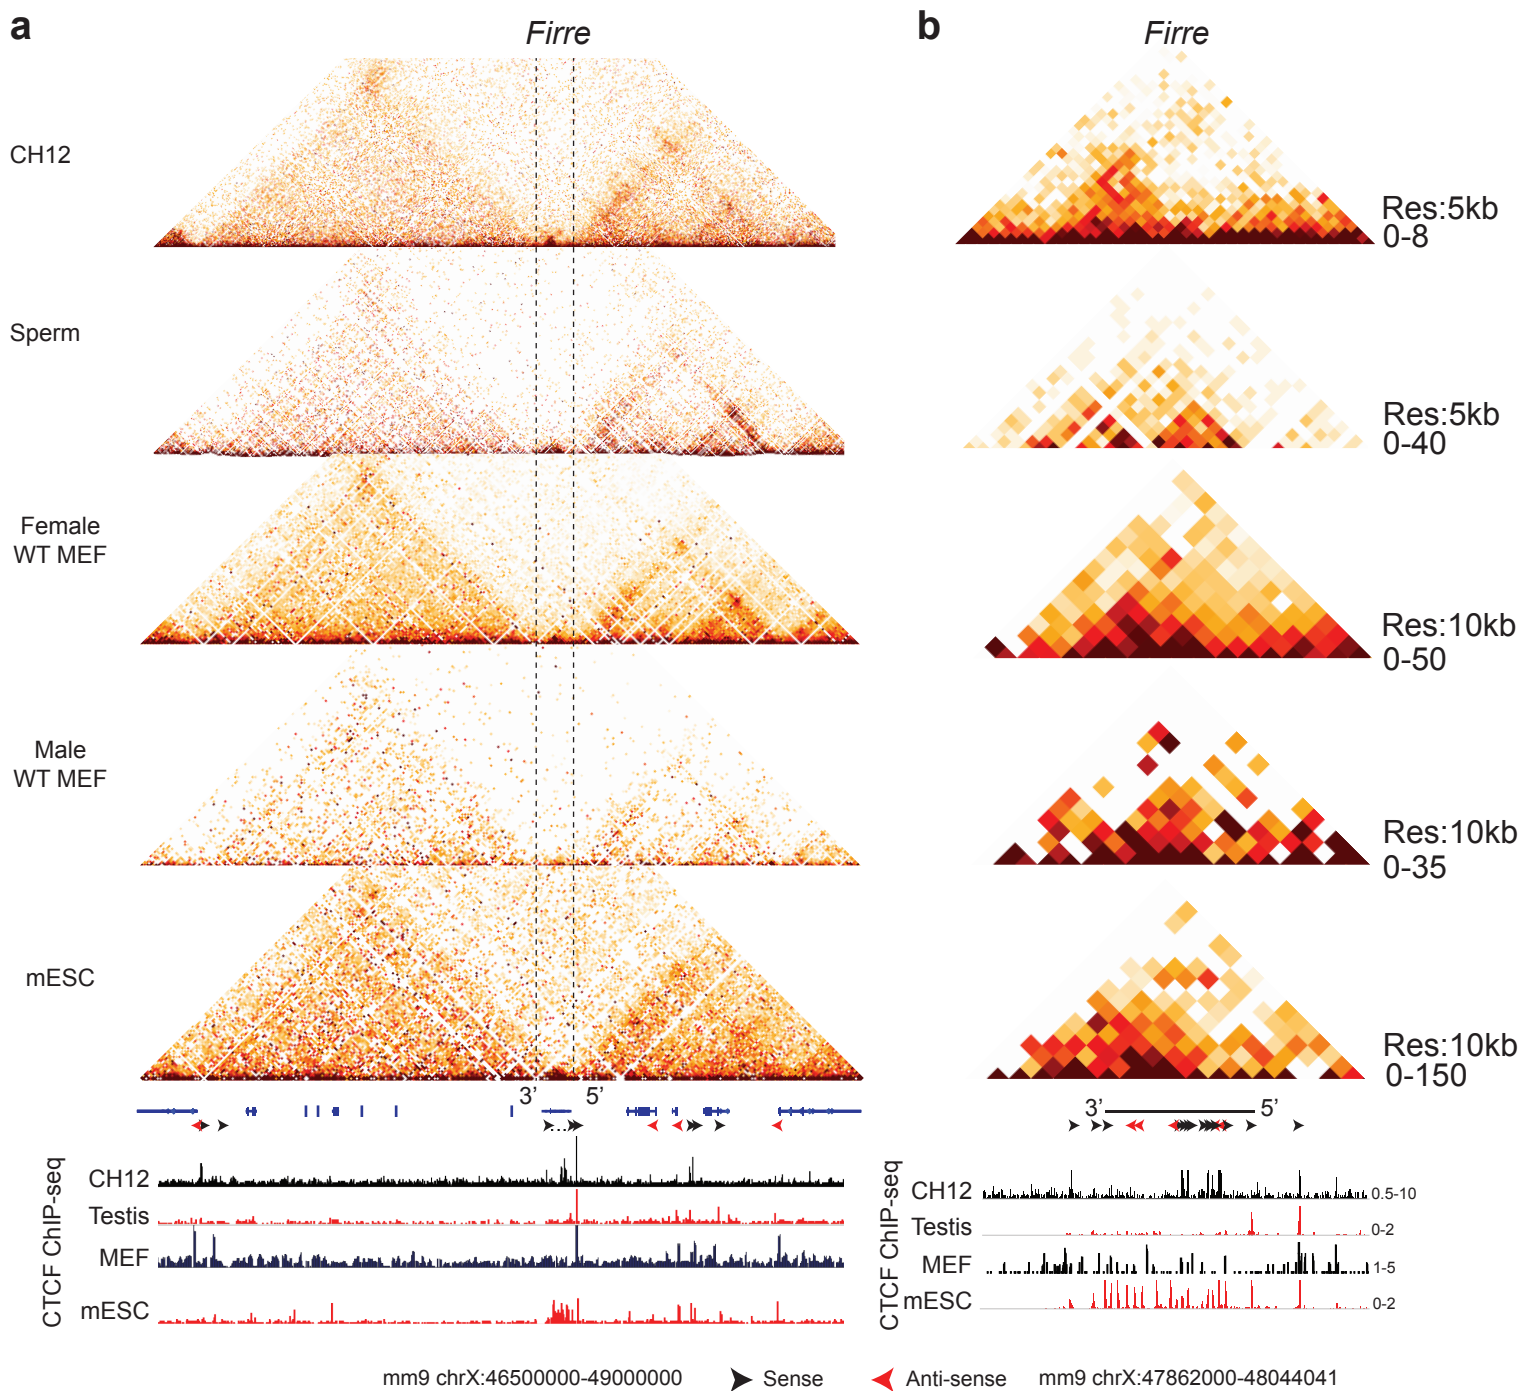

**Supplementary Figure 11 – High resolution interaction topology of the *Firre* locus in mouse samples. a)** Hi-C interaction heatmaps showing the neighboring TADs of the *Firre* locus in CH12 cells, male and female MEFs and mESCs. The CTCF binding and orientation is included below. The binding of CTCF in convergent orientation, although can explain the presence of the 5' TAD, does not explain the 3' TAD formation (sense-sense orientation). **b)** A zoom-in of the interaction profile of *Firre* gene with CTCF binding and orientations. There does not seem to be a prevalent circular formation as in the case of human samples (Supplementary Figure 10).



Supplementary Table 1 - Read statistics for Hi-C samples

| Hi-C Sample                  | Raw read pairs | Uniquely Mapped read pairs | Valid interactions |
|------------------------------|----------------|----------------------------|--------------------|
| Male MEF WT-R1               | 114,678,463    | 95,404,889                 | 69,318,730         |
| Male MEF WT-R2               | 86,882,511     | 76,518,504                 | 53,749,827         |
| Male MEF WT-R3               | 271,487,347    | 165,513,925                | 138,321,004        |
| Male MEF FIRRE KO-R1         | 106,726,083    | 85,117,692                 | 54,302,424         |
| Male MEF FIRRE KO-R2         | 91,092,126     | 72,591,309                 | 45,617,460         |
| Female MEF WT-R1             | 300,118,001    | 276,153,109                | 201,186,013        |
| Female MEF WT-R2             | 264,381,469    | 222,535,419                | 156,227,921        |
| Female MEF WT-R3             | 53,809,968     | 51,401,310                 | 33,435,762         |
| Female MEF FIRRE KO-R1       | 200,075,316    | 185,816,580                | 134,063,833        |
| Female MEF FIRRE KO-R2       | 134,741,024    | 125,441,114                | 88,843,107         |
| Female MEF FIRRE KO-R3       | 124,199,684    | 28,072,401                 | 24,603,248         |
| Male MEF WT Combined         | 473,048,321    | 288,582,482                | 213,998,225        |
| Male MEF FIRRE KO Combined   | 197,818,209    | 99,919,884                 | 79,967,990         |
| Female MEF WT Combined       | 726,169,857    | 457,968,046                | 340,402,145        |
| Female MEF FIRRE KO Combined | 459,016,024    | 256,742,380                | 186,778,656        |
| Minus DOX tg24/rTTA -/y      | 256,039,805    | 126,530,427                | 108,778,333        |
| Plus DOX tg24/rTTA -/y       | 179,119,831    | 82,450,869                 | 70,630,033         |
| Firre KO mESC Combined       | 105,146,120    | 95,700,113                 | 48,736,700         |
| WT N3 mESC Combined          | 321,517,882    | 108,590,279                | 68,002,698         |

| Allele-specific Hi-C Samples              | Raw read pairs | Uniquely Mapped read pairs | Interactions for mm9 |
|-------------------------------------------|----------------|----------------------------|----------------------|
| Female C57BL6 FIRRE KO x CAST WT Rep1     | 155,422,998    | 90,816,396                 | 86,803,615           |
| Female C57BL6 FIRRE KO x CAST WT Rep2     | 222,461,549    | 122,533,811                | 115,605,400          |
| Female C57BL6 FIRRE KO x CAST WT Combined | 377,884,547    | 213,350,207                | 144,528,591          |
| Male C57BL6 FIRRE KO x CAST WT Rep1       | 75,147,577     | 42,035,680                 | 31,113,184           |
| Male C57BL6 FIRRE KO x CAST WT Rep2       | 89,840,746     | 49,792,476                 | 42,642,939           |
| Male C57BL6 FIRRE KO x CAST WT Combined   | 164,988,323    | 91,828,156                 | 73,756,123           |

| Allele-specific Hi-C Samples              | Interactions for C57BL6 | Interactions for CAST |
|-------------------------------------------|-------------------------|-----------------------|
| Female C57BL6 FIRRE KO x CAST WT Rep1     | 26,846,457              | 24,206,598            |
| Female C57BL6 FIRRE KO x CAST WT Rep2     | 38,266,250              | 32,323,800            |
| Female C57BL6 FIRRE KO x CAST WT Combined | 46,249,797              | 40,590,782            |
| Male C57BL6 FIRRE KO x CAST WT Rep1       | 11,093,395              | 9,602,935             |
| Male C57BL6 FIRRE KO x CAST WT Rep2       | 15,568,642              | 13,323,808            |
| Male C57BL6 FIRRE KO x CAST WT Combined   | 24,873,358              | 21,388,725            |

Supplementary Table 2: qPCR and Genotyping Primers

|                     |                                |
|---------------------|--------------------------------|
| F_Firre-1_Ex        | TCACAATGGGCTGGGTATTCTC         |
| R_Firre-1_Ex        | CCTGGGTCCTCTATAAAAGCAACAG      |
| F_Sry               | TTGTCTAGAGAGCATGGAGGGCCATGTCAA |
| R_Sry               | CCACTCCTCTGTGACACTTTAGCCCTCCGA |
| F_FirreWT_2         | GGAGGAGTGCTGCTTACTGG           |
| R_FirreWT_2         | TCTGTGAGCCACCTGAAATG           |
| F_TRE               | TACCACTCCCTATCAGTGA            |
| R_Firre             | CGGCTTCATCTTCAGTCCTC           |
| F_ActB_qPCR         | GCTGTATTCCCCTCCATCGTG          |
| R_ActB_qPCR         | CACGGTTGGCCTTAGGGTTCAG         |
| F_Gapdh_qPCR        | GGTGAAGGTCGGTGTGAACG           |
| R_Gapdh_qPCR        | CTCGCTCCTGGAAGATGGTG           |
| F1-Firre1.49_qRTPCR | AAATCCGAGGACAGTCGAGC           |
| R1-Firre1.49_qRTPCR | CCGTGGCTGGTGACTTTTTTG          |

Supplementary Table 3 - List of 3C primers

|                |                         |
|----------------|-------------------------|
| DXZ4           | ACAATGGCTTGTGCTGTAAGATT |
| DXZ4 plus 1Mb  | AAGTGGAGCATGTGTCCTTCTTA |
| DXZ4 minus1Mb  | CCAGTAAGCTAAGGCTCAACAGA |
| x75_minus1Mb   | TCTGTAATCTGCACTCTCACCTG |
| x75            | GTCTTATTGACGGTGTCTTTTGC |
| x75_plus1Mb    | CCATTCCTAAGTGACATGCTTC  |
| Firre_minus1Mb | AATAGATCCTCTAGGGTGCTTGG |
| Firre          | TTTCATTTCTGTCTGGATGACCT |
| Firre_plus1Mb  | GACTTAGCTTTGGAAAGCACTGA |

Supplementary Table 4 - List of CRISPR/Cas9 live-cell imaging sgRNAs

|            |                              |
|------------|------------------------------|
| mFirme_1FW | CACCG TACCCTCAGTGTGTCAGCACTG |
| mFirme_2FW | CACCG TACTCAGGGTATGCCCACTG   |
| mFirme_3FW | CACCG AGCAATAAAACTGTAAGACA   |
| mDXZ4_1FW  | CACCG TCCTATGAGAGAGAATTGTG   |
| mDXZ4_2FW  | CACCG TGAGTGGAATAAGTCTCCCA   |
| mDXZ4_3FW  | CACC GTGTGCAGCTGAACACGTCG    |
| mx75_1FW   | CACC G TTTGTACGGAACCTTCACCCG |
| mx75_2FW   | CACC GGACGCTGGGACTAAGTCAG    |
| mx75_3FW   | CACC G ATCTCCGGAGCTAAACGGTG  |
